# Supplementary material for: A “micropores & active species protection” strategy for the preparation of a high-performance Fe/S/N-composited porous carbon catalyst for efficient oxygen reduction reaction and zinc–air batteries
Source: Royal Society of Chemistry journal article supplement (doi:10.1039/d1se01341f), 2021-01-01
Supplement: d1se01341f1.pdf [file d1se01341f1.pdf]

## Electronic Supplementary Information

### **A “micropores & active species protection” strategy for the preparation of high-performance Fe/S/N-composited porous carbon catalyst with efficient oxygen reduction reaction and zinc-air batteries**

Zuoxu Xiao, Chaoyi Yang, Shanshan Liu, Wei Yan, Fuling Wang, Xue Liu, Tianle Yang, Xiyu Li\*,  
Yanli Chen\*

*College of Science, School of Materials Science and Engineering, China University of Petroleum  
(East China), Qingdao, 266580, Shandong, China*

## **Characterization**

FESEM images were observed on field-emission scanning electron microscope (SEM, Quant 250FEG). High-resolution transmission electron microscopy images were collected at an acceleration voltage of 200 kV (TEM, JEM-2100F). X-ray diffraction patterns were performed on a Rigaku Ultima IV X-Ray Diffractometer. Raman spectra were carried out on a laser Raman microscope system (HORIBA Evolution Raman scope) with the excitation wavelength of 532 nm. The N<sub>2</sub> adsorption-desorption isothermal curve and the BET surface area were calculated via MicroASAP2020 at 77 K. XPS was measured by Thermo ESCALAB 250 surface analysis system.

## **Electrochemical measurements**

The electrochemical measurements were evaluated using a CHI660E electrochemical workstation in a standard three-electrode setup with a glass carbon electrode (GC, diameter of 5 mm) loaded with the catalysts was used as the working electrode. The procedure for the preparation of a working electrode was as following: 5 mg of the catalyst powder was dispersed in 800  $\mu$ L of absolute ethanol and 30  $\mu$ L of Nafion (5 wt%, Sigma-Aldrich) to obtain a homogeneous ink under ultrasonication, then 10  $\mu$ L of the ink was slightly dropped on the glassy carbon electrode. For ORR tests, cyclic voltammetry (CV) curves were tested in a N<sub>2</sub>-saturated or O<sub>2</sub>-saturated 0.1 M KOH

electrolyte with a scan rate of 50 mV s<sup>-1</sup>, respectively. RDE/RRDE tests were measured in O<sub>2</sub>-saturated 0.1 M KOH electrolyte at 10 mV s<sup>-1</sup>, respectively.

**Zinc-air battery tests:**

The measurements of zinc-air batteries were evaluated under ambient conditions. A polished zinc plate and 6.0 M KOH solution were used as anode and electrolyte, respectively. The cathode was prepared by loading catalysts on the carbon paper (catalyst loading amount of 1.0 mg cm<sup>-2</sup>).

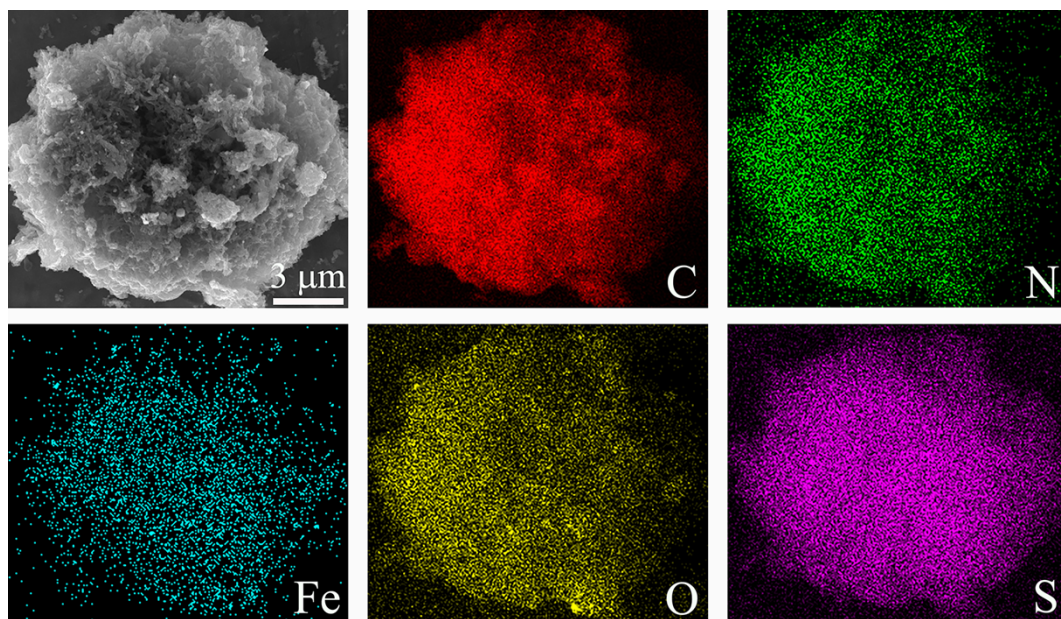

**Fig. S1.** SEM images of FeTPP-MP@PTh-900 used in the EDS mapping area revealing the elemental distribution of C, N, Fe, O and S.

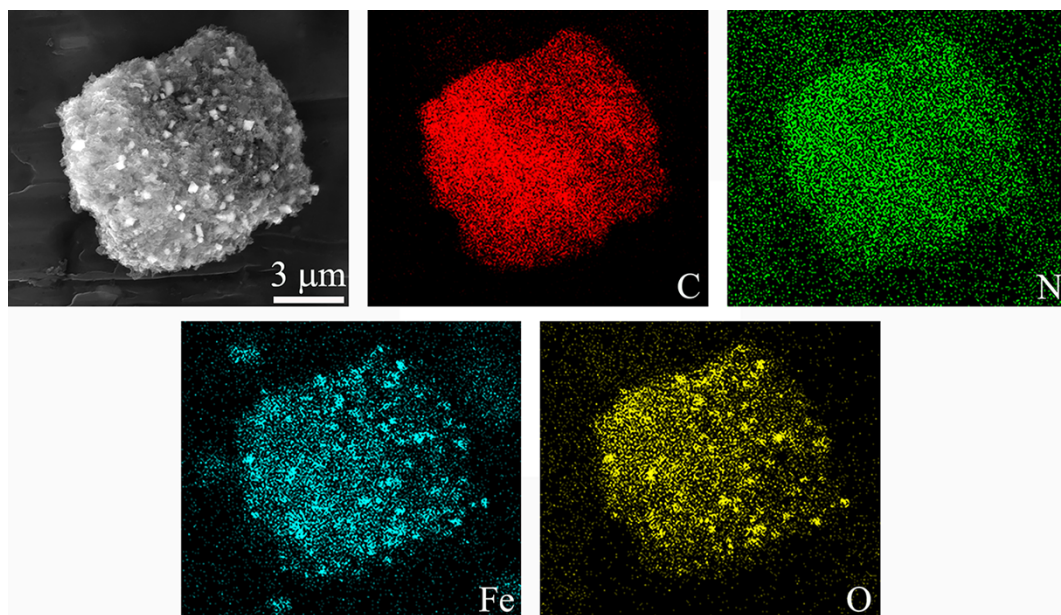

**Fig. S2.** SEM images of FeTPP-MP-900 used in the EDS mapping area revealing the elemental distribution of C, N, Fe and O.

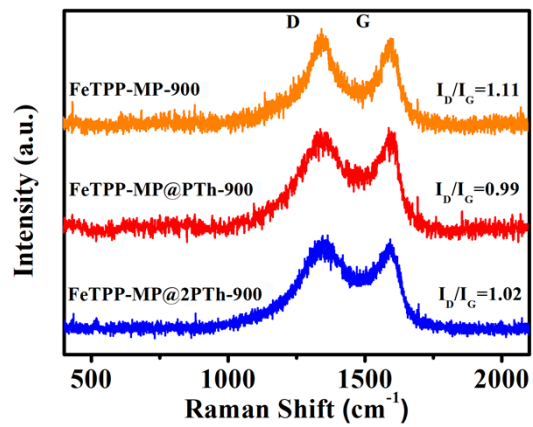

**Fig. S3.** Raman spectra of FeTPP-MP-900, FeTPP-MP@PTh-900 and FeTPP-MP@2PTh-900.

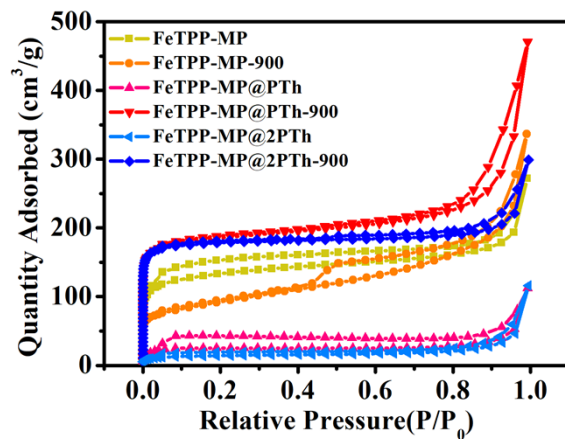

**Fig. S4.** N<sub>2</sub> adsorption/desorption isotherm plots of precursors (FeTPP-MP, FeTPP-MP@PTh and FeTPP-MP@2PTh) and catalysts (FeTPP-MP-900, FeTPP-MP@PTh-900 and FeTPP-MP@2PTh-900).

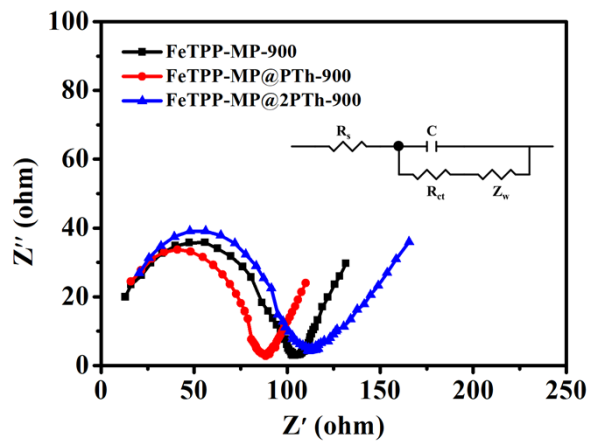

**Fig. S5.** Nyquist plots of FeTPP-MP-900, FeTPP-MP@PTh-900 and FeTPP-MP@2PTh-900 catalysts-modified electrodes in 0.1 M KOH solution in the frequency range of 0.1-10000 Hz, respectively, (Inset: corresponding equivalent circuit).

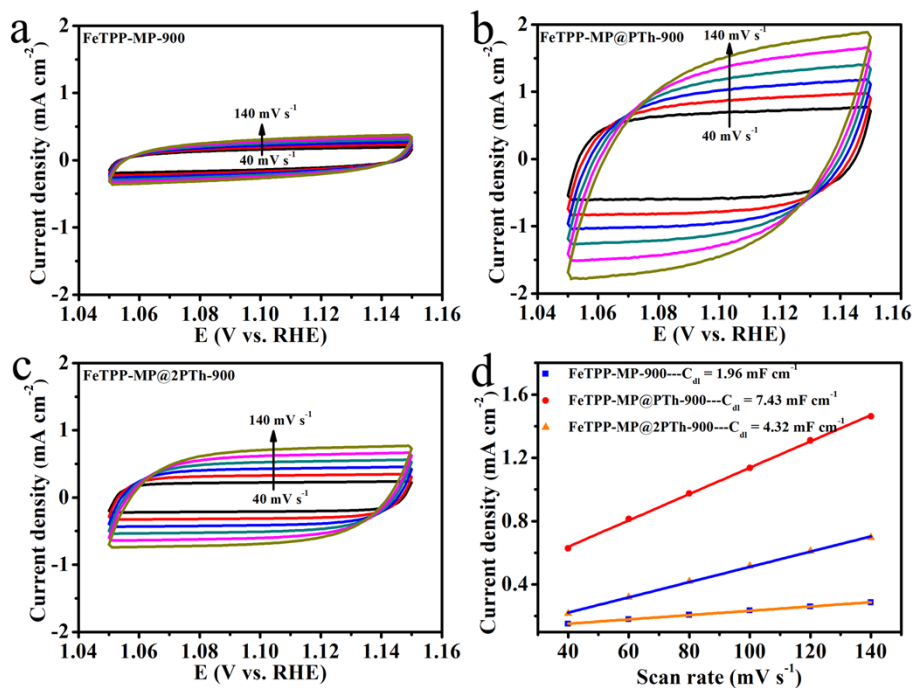

**Fig. S6.** Cyclic voltammograms (CV) at various scan rates of (a) FeTPP-MP-900, (b) FeTPP-MP@PTh-900, (c) FeTPP-MP@2PTh-900 in 0.1 M KOH solution; (d) Plots of the capacitive currents as a function of scan rate for samples as well as the double-layer capacitance values for samples.

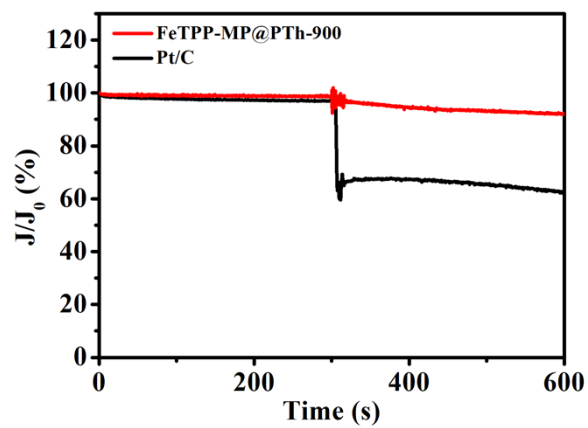

**Fig. S7.** Upon the addition of 3 M methanol in O<sub>2</sub>-saturated 0.1 M KOH solution with the rotation speed of 1600 rpm.

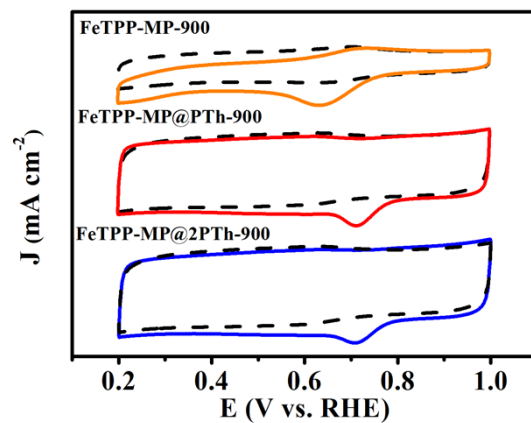

**Fig. S8.** CV curves of FeTPP-MP-900, FeTPP-MP@PTh-900 and FeTPP-MP@2PTh-900 in  $\text{O}_2$ -saturated (solid lines) and  $\text{N}_2$ -saturated (dot lines) 0.5 M  $\text{H}_2\text{SO}_4$  at  $50 \text{ mV s}^{-1}$ , respectively.

**Table S1.** The electrocatalytic activities of the recently reported catalysts for ORR in 0.1 M KOH.

| Catalyst                   | $E_{\text{onset}}/ \text{V}$ | $E_{1/2}/\text{V}$ | Reference                                  |
|----------------------------|------------------------------|--------------------|--------------------------------------------|
| FeTPP-MP@PTh-900           | 0.96                         | 0.89               | This Work                                  |
| FN <sub>3</sub> SG         | 0.99                         | 0.80               | Carbon. 2019, 142: 1-12                    |
| Cu-Fe-N-C                  | 0.97                         | 0.86               | Appl. Catal. B-Environ. 2019, 242: 209-217 |
| Fe-N-HMCTs                 | 0.99                         | 0.87               | Adv. Funt. Mater. 2021, 31: 2009197        |
| Fe <sub>3</sub> C-FeN/NC-2 | 0.95                         | 0.80               | J. Mater. Chem. A 2021, 9: 6831-6840       |
| Zigzag-type-GO             | 0.96                         | 0.82               | Adv. Mater. 2018, 30: 3819-3828            |
| Fe@N-Go                    | 0.98                         | 0.85               | Nano Res. 2020, 11: 2217-2228.             |
| Fe SA-NSC-900              | 0.94                         | 0.86               | ACS Energy Lett. 2021, 6: 379-386.         |

**Table S2.** The electrocatalytic activities of the recently reported catalysts for ORR in 0.5 M H<sub>2</sub>SO<sub>4</sub>.

| Catalyst           | E <sub>onset</sub> / V | E <sub>1/2</sub> /V | Reference                                      |
|--------------------|------------------------|---------------------|------------------------------------------------|
| FeTPP-MP@PTh-900   | 0.80                   | 0.75                | This Work                                      |
| Fe-SAC/NC          | 0.85                   | 0.69                | Nano Energy 2020, 72:<br>104670                |
| Fe@NSC20-7001-9001 | 0.85                   | 0.79                | J. Catal. 2019, 370: 130-137                   |
| Fe-N-C spheres     | 0.861                  | 0.73                | ACS Catal. 2017, 7: 1655-<br>1663              |
| FeNC-D0.5          | 0.85                   | 0.75                | Small 2020, 16: 2006178                        |
| Fe-SAs/NSC         | 0.84                   | 0.70                | J. Am. Chem. Soc. 2019,<br>141: 20118-20126    |
| Fe/N-HCS-0.5-800   | 0.80                   | 0.59                | J. Colloid InterfaceSci. 2019,<br>544: 178-187 |
| Fe-N-C/N-OMC       | 0.91                   | 0.73                | Appl. Catal. B-Environ.<br>2021, 280: 119411   |
